# Supplementary material for: Patterns of admission and outcomes of patients admitted to the intensive care unit of Jimma Medical Center in Ethiopia
Source: Research Square preprint supplement (doi:10.21203/rs.3.rs-6523003/v1), 2025-05-20
Supplement: Supplementary file 1 [file e91441b93c3ce195d8636f3b.docx]

**Annex III: Data collection Checklist**

Data collection checklist on disease pattern and management outcome of patients admitted to adult intensive care unit in JUMC, from January 2024 to December 2024, Jimma, Ethiopia.

Date of data collection …………….

**Questioner Code---------------------**

**Part I: Socio-demographic Characteristics**

1. Medical record number………..
2. Age of the patient (in years) ----------
3. Sex of the patient: A. Male------- B. Female -------
4. Residence place of the patient: A. Urban------- B. Rural-------

**Part II: Clinical data of the patient**

1. When was the patient admitted to the ICU? (Date/Month/Year:--------- )
2. Site of admission
3. Emergency ICU
4. Medical ICU
5. Surgical ICU
6. Source of admission to ICU in the hospital
   - - 1. Medical ward
       2. Surgical ward
       3. Gynecology and Obstetrics ward
       4. Emergency department
       5. Operation room
       6. Other Hospital
       7. Other (specify)-----
7. Underlying disease ( Co-morbidities) 1. Yes----- 2. No------
8. If the answer of question 4 is yes specify ____________
9. Frequency of admission to ICU
10. First admission
11. Readmission ( 2 times and above)

7. Diagnosis at ICU admission _______________________

8. Vital sign at ICU admission

1. RR __________(breath/minute)
   - 1. <12bpm
     2. 12-20 bpm
     3. >20 bpm
2. Pulse rate………..(bit per minute)
   - 1. <60bpm
     2. 60-100bpm
     3. >100bpm
     4. Not palpable
3. Mean arterial pressure___________ beat/minute
   - 1. <65mmHg
     2. >65mmHg
     3. Unrecordable
4. T o _________________(in celsius)
   - 1. <36.5
     2. 36.5-37.5
     3. >37.5
5. Spo2 _______________%
   - 1. <90%
     2. >90%
6. Glasgow coma scale at ICU admission ___________score
   - 1. <8
     2. 8-12
     3. >12
7. Urine output in the first 24 hours after ICU admission ___________ml
   - 1. <800ml
     2. 800-2000ml
     3. >2000ml
8. Complications after ICU admission. 1.yes-------- 2.No-------
9. If answer for question 10 is yes, specify
   - 1. Hypotention
     2. Aspiration pneumonia
     3. Acute kidney injury
     4. Cardiac arrest
     5. Electrolyte abnormality
     6. Other

**Part III: Therapeutic intervention given at ICU stay**

1. Intubation and mechanical ventilation 1. Yes----- 2. No--------
2. If the answer for 1 is yes, Length of mechanical ventilation _______days
3. Noninvasive oxygen support 1. Yes 2. No
4. Vasopressor/inotropes support. 1. Yes. 2. No
5. If answer for questions 4 is yes, specify
   - 1. Adrenaline
     2. Dopamine
     3. Dobutamine
     4. Nor-adrenaline
6. Gastro intestinal ulcer prophylaxis is given 1. Yes 2.No
7. Deep vein thrombosis prophylaxis is given 1. Yes 2.No
8. Blood transfused 1. Yes 2. No
9. Tube feeding 1. Yes 2.No
10. Antibiotics given 1.yes 2.No
11. If the answer for 10 is yes—for how long?
    - 1. Less than 7 days
      2. More than 7 days
12. Sedative /hypnotics given. 1. Yes 2. No
    - 1. Diazepam
      2. Phenobarbital
      3. Morphine
      4. Fentanyl
      5. Propofol
      6. Ketamine

**Part IV: Patient Outcome and ICU stay**

1. What is the outcome of the patient from the ICU?
2. The patient died
3. The patient survived
4. If the outcome is “*survived*”, where was she/he sent for further management and/or recovery?
5. Patient Transferred to the respective ward
6. Patient Referred to other health facility
7. Patient Discharged to home
8. The patient was still in the ICU till the end of data collection date
9. If the outcome is “death” what is immediate possible cause of death
   - 1. Respiratory failure
     2. Cardiac arrest
     3. Multi-organ failure
10. Total length of stay in ICU ____________days

**Part V: Laboratory investigation results during ICU admission**

| **CBC** | **WBC**  **HCT**  **PLT** |  |
| --- | --- | --- |
| **RFT** | **Creatinine**  **BUN** |  |
| **Liver enzymes** | **AST**  **ALT** |  |
| **FBS** |  |  |
| **Serum electrolyte** | **Na**  **Cl**  **K+**  **Ca2+** |  |

**Name of data collector sign-------date-------**
